# Supplementary material for: Circulating TNF Receptors 1 and 2 Predict Mortality in Patients with End-stage Renal Disease Undergoing Dialysis
Source: PubMed Central journal article supplement (PMC5335256; doi:10.1038/srep43520), 2017-03-03
Supplement: srep43520-s1.pdf [file srep43520-s1.pdf]

Circulating TNF Receptors 1 and 2 Predict Mortality in Patients with End-stage Renal Disease Undergoing Dialysis

Tomohito Gohda, MD, PhD<sup>1</sup>, Shuntaro Maruyama, MD, PhD<sup>1</sup>, Nozomu Kamei, MD, PhD<sup>2</sup>, Saori Yamaguchi, MD, PhD<sup>1</sup>, Terumi Shibata<sup>1</sup>, Maki Murakoshi, MD, PhD<sup>1</sup>, Satoshi Horikoshi, MD, PhD<sup>1</sup>, Yasuhiko Tomino, MD, PhD<sup>1</sup>, Isao Ohsawa, MD, PhD<sup>3</sup>, Hiromichi Gotoh, MD, PhD<sup>3</sup>, Shuko Nojiri, PhD<sup>4</sup>, Yusuke Suzuki, MD, PhD<sup>1</sup>

<sup>1</sup> Division of Nephrology, Department of Internal Medicine, Juntendo University Faculty of Medicine

<sup>2</sup> Division of Endocrinology and Metabolism, Department of Internal Medicine, Hiroshima Red Cross Hospital and Atomic-bomb Survivors Hospital

<sup>3</sup> Department of Internal Medicine, Saiyu Soka Hospital

<sup>4</sup> Clinical Research Support Center (JCRSC), Juntendo University

**Supplementary Table 1.** TNF-related biomarker added predictive benefit for prediction of all-cause mortality in hemodialysis patients -ROC curve analysis-

|                                            | AUC   | Difference in AUC (95%CI) | <i>P</i> |
|--------------------------------------------|-------|---------------------------|----------|
| hs-CRP                                     | 0.613 |                           |          |
| TNF $\alpha$ & hs-CRP vs. hs-CRP           | 0.637 | 0.055 (-0.001, 0.055)     | 0.13     |
| TNFR1 & hs-CRP vs. hs-CRP                  | 0.632 | 0.064 (-0.027, 0.064)     | 0.43     |
| TNFR2 & hs-CRP vs. hs-CRP                  | 0.678 | 0.126 (0.003, 0.126)      | 0.04     |
| Basic model <sup>a</sup>                   | 0.733 |                           |          |
| Basic model + TNF $\alpha$ vs. Basic model | 0.733 | 0.005 (-0.006, 0.005)     | 0.91     |
| Basic model + TNFR1 vs. Basic model        | 0.736 | 0.019 (-0.013, 0.019)     | 0.71     |
| Basic model + TNFR2 vs. Basic model        | 0.744 | 0.034 (-0.014, 0.034)     | 0.40     |

ROC, receiver-operating characteristic; AUC, areas under the ROC

<sup>a</sup>Basic model: age, previous history of CVD, SBP (categorical), maximum  $\Delta$ SBP, and hs-CRP

Abbreviations used in this table are the same as in Table 1.

**Supplementary Table 2.** TNF-related biomarker added predictive benefit for prediction of all-cause mortality in hemodialysis patients -IDI and NRI analysis-

|                                                         | <b>IDI<br/>(95%CI)</b>   | <b>Relative IDI</b> | <b>P</b> | <b>NRI<br/>(95%CI)</b>   | <b>P</b> |
|---------------------------------------------------------|--------------------------|---------------------|----------|--------------------------|----------|
| TNF $\alpha$ & hs-CRP vs. hs-CRP                        | 0.004<br>(-0.003, 0.012) | 0.160               | 0.19     | 0.173<br>(-0.071, 0.418) | 0.17     |
| TNFR1 & hs-CRP vs. hs-CRP                               | 0.014<br>(0.001, 0.027)  | 0.509               | 0.04     | 0.389<br>(0.154, 0.623)  | 0.002    |
| TNFR2 & hs-CRP vs. hs-CRP                               | 0.041<br>(0.018, 0.064)  | 1.487               | <0.001   | 0.425<br>(0.185, 0.665)  | <0.001   |
| TNF $\alpha$ & Basic model vs. Basic model <sup>a</sup> | 0.001<br>(-0.002, 0.004) | 0.005               | 0.66     | 0.077<br>(-0.168, 0.322) | 0.54     |
| TNFR1 & Basic model vs. Basic model                     | 0.008<br>(-0.001, 0.018) | 0.06                | 0.08     | 0.277<br>(0.038, 0.516)  | 0.03     |
| TNFR2 & Basic model vs. Basic model                     | 0.022<br>(0.006, 0.039)  | 0.165               | <0.01    | 0.373<br>(0.133, 0.614)  | <0.01    |

IDI, integrated discrimination improvement; NRI, net reclassification index

<sup>a</sup>Basic model: age, previous history of CVD, SBP (categorical), maximum  $\Delta$ SBP, hs-CRP

Abbreviations used in this table are the same as in Table 1.
